# Supplementary material
Source: publisher site journal article supplement (https://www.spandidos-publications.com/7667/downloadSupplementary)
Supplement: Supplementary file 1 [file downloadSupplementary]

Table SI. Relation between nivolumab efficacy and clinical characteristics in male patients.

| Characteristic         | Nivolumab efficacy   |                    | Disease Control Rate | P-value |
|------------------------|----------------------|--------------------|----------------------|---------|
|                        | PR+SD group<br>n = 9 | PD group<br>n = 10 |                      |         |
| Age, years             | 74.1±2.4             | 74.6±3.0           |                      | 0.9015  |
| Body weight, kg        | 62.7±2.0             | 49.3±2.2           |                      | 0.0003  |
| Body height, cm        | 166.6±1.5            | 161.5±2.6          |                      | 0.1067  |
| BMI, kg/m <sup>2</sup> | 22.56±0.56           | 18.88±0.69         |                      | 0.0007  |
| Tumor depth            |                      |                    |                      |         |
| T1/T2/T3/T4a           | 4                    | 6                  | 40.0%                | 0.6563  |
| T4b                    | 5                    | 4                  | 55.6%                |         |
| LN status              |                      |                    |                      |         |
| N0/N1                  | 1                    | 3                  | 25.0%                | 0.5820  |
| N2/N3/N4               | 8                    | 7                  | 53.3%                |         |
| Metastasis             |                      |                    |                      |         |
| M0                     | 8                    | 9                  | 47.1%                | 1.0000  |
| M1                     | 1                    | 1                  | 50.0%                |         |
| Administrated courses  |                      |                    |                      |         |
| ≤4                     | 1                    | 9                  | 10.0%                | 0.0055  |
| 4                      | 7                    | 2                  | 77.8%                |         |
| Total                  | 9                    | 10                 | 47.4%                | -       |

BMI, body mass index; LN, lymph node.

Table SII. Association between blood test results and nivolumab efficacy among male patients.

| Items                                  | Nivolumab efficacy        |                       | P-value |
|----------------------------------------|---------------------------|-----------------------|---------|
|                                        | PR + SD<br>group<br>(n=9) | PD<br>group<br>(n=10) |         |
| WBC, /mm <sup>3</sup>                  | 4,522±267                 | 6,420±635             | 0.0173  |
| Neutrophil, %                          | 68.87±1.90                | 70.46±1.99            | 0.5701  |
| Eosinophil, %                          | 2.10±0.62                 | 2.24±0.65             | 0.8786  |
| Basophil, %                            | 0.71±0.08                 | 0.38±0.08             | 0.0078  |
| Monocyte, %                            | 9.93±1.93                 | 9.02±0.95             | 0.5228  |
| Lymphocyte, %                          | 18.39±1.51                | 17.90±1.53            | 0.8230  |
| HGB, g/dl                              | 11.21±0.61                | 11.34±0.52            | 0.8739  |
| PLT, x10 <sup>4</sup> /mm <sup>3</sup> | 178.0±19.1                | 251.7±28.5            | 0.0479  |
| TP, g/dl                               | 6.36±0.15                 | 6.58±0.09             | 0.2256  |
| ALB, g/dl                              | 3.84±0.13                 | 3.43±0.17             | 0.0692  |
| AST, IU/ml                             | 25.1±2.8                  | 31.9±7.0              | 0.3887  |
| ALT, IU/ml                             | 17.6±4.1                  | 36.2±12.3             | 0.1780  |
| LDH, IU/ml                             | 197.1±8.7                 | 196.5±18.9            | 0.9770  |
| T-BIL, mg/dl                           | 1.07±0.49                 | 0.57±0.06             | 0.3465  |
| CRE, mg/dl                             | 0.952±0.064               | 0.735±0.069           | 0.0348  |
| eGFR, ml/min/1.73 m <sup>2</sup>       | 63.02±6.23                | 84.95±6.90            | 0.0305  |
| CCr, ml/min                            | 64.13±7.60                | 64.64±5.94            | 0.9588  |
| CRP, mg/dl                             | 0.226±0.118               | 1.378±0.645           | 0.1104  |
| NLR                                    | 3.99±0.37                 | 4.32±0.51             | 0.6063  |
| PNI                                    | 42.51±1.23                | 40.01±1.50            | 0.2146  |
| CAR                                    | 0.062±0.034               | 0.462±0.225           | 0.1113  |

Data are presented as mean ± standard error of the mean. WBC, white blood cell count; HGB, hemoglobin; PLT, platelet count; TP, total protein; ALB, albumin; AST, aspartate aminotransferase; ALT, alanine aminotransferase; LDH, lactate dehydrogenase; T-BIL, total bilirubin; eGFR, estimated glomerular filtration rate; Ccr, creatinine clearance; CRP, C-reactive protein; NLR, neutrophil to lymphocyte ratio; PNI, prognostic nutritional index; CAR, CRP to albumin ratio.

Table SIII. Association of the classifications (BW, WBC, basophil, platelet, albumin, and CRP) and nivolumab efficacy in male patients.

| Item                                        | Nivolumab efficacy |                 | Disease Control Rate | P-value |
|---------------------------------------------|--------------------|-----------------|----------------------|---------|
|                                             | PR+SD group (n=9)  | PD group (n=10) |                      |         |
| Body weight, kg                             |                    |                 |                      |         |
| $\geq 53.5$                                 | 9                  | 3               | 75.0%                | 0.0031  |
| $< 53.5$                                    | 0                  | 7               | 0.0%                 |         |
| WBC, /mm <sup>3</sup>                       |                    |                 |                      |         |
| $\leq 5,000$                                | 8                  | 2               | 80.0%                | 0.0055  |
| $> 5,000$                                   | 1                  | 8               | 11.1%                |         |
| Basophil, %                                 |                    |                 |                      |         |
| $\geq 0.6$                                  | 7                  | 2               | 77.8%                | 0.0230  |
| $< 0.6$                                     | 2                  | 8               | 20.0%                |         |
| Platelet, x10 <sup>4</sup> /mm <sup>3</sup> |                    |                 |                      |         |
| $\geq 145$                                  | 4                  | 10              | 28.6%                | 0.0108  |
| $< 145$                                     | 5                  | 0               | 100.0%               |         |
| Albumin, mg/dl                              |                    |                 |                      |         |
| $\geq 3.9$                                  | 6                  | 1               | 85.7%                | 0.0198  |
| $< 3.9$                                     | 3                  | 9               | 25.0%                |         |
| CRP, mg/dl                                  |                    |                 |                      |         |
| $\leq 0.10$                                 | 6                  | 0               | 100.0%               | 0.0031  |
| $> 0.10$                                    | 3                  | 10              | 23.1%                |         |
| Total                                       | 9                  | 13              | 40.9%                | -       |

WBC, white blood cell count; CRP, C-reactive protein.

Table SIV. Association between sex and featured six variants.

| Items                                  | Sex            |                 | P-value |
|----------------------------------------|----------------|-----------------|---------|
|                                        | Male<br>(n=19) | Female<br>(n=3) |         |
| Body weight, kg                        | 55.6±2.1       | 41.6±2.0        | 0.0015  |
| WBC, /mm <sup>3</sup>                  | 5521±413       | 6100±1081       | 0.6560  |
| Basophil, %                            | 0.54±0.07      | 0.40±0.11       | 0.3699  |
| PLT, x10 <sup>4</sup> /mm <sup>3</sup> | 216.8±19.1     | 273.7±68.7      | 0.4986  |
| ALB, g/dl                              | 3.62±0.12      | 3.37±0.33       | 0.5191  |
| CRP, mg/dl                             | 0.832±0.362    | 0.430±0.140     | 0.3124  |

Data are presented as mean ± standard error of the mean. WBC, white blood cell count; PLT, platelet count; ALB, albumin; CRP, C-reactive protein.
